# Supplementary material for: Itraconazole Nanosuspensions via Dual Centrifugation Media Milling: Impact of Formulation and Process Parameters on Particle Size and Solid-State Conversion as Well as Storage Stability
Source: Pharmaceutics. 2022 Jul 22;14(8):1528. doi: 10.3390/pharmaceutics14081528 (PMC9332252; doi:10.3390/pharmaceutics14081528)
Supplement: Supplementary file 1 [file pharmaceutics-14-01528-s001.zip › pharmaceutics-1789617-supplementary.pdf]

Supplementary material to:

**Itraconazole nanosuspensions via dual centrifugation media milling: impact of formulation and process parameters on particle size and solid-state conversion as well as storage stability**

Ann-Cathrin Willmann<sup>1,2</sup>, Kai Berkenfeld<sup>2</sup>, Thilo Faber<sup>2</sup>, Herbert Wachtel<sup>3</sup>, Georg Boeck<sup>4</sup>, Karl G. Wagner<sup>2\*</sup>

<sup>1</sup> Pharmaceutical Development, Boehringer Ingelheim Pharma GmbH & Co. KG, Birkendorfer Straße 65, 88397 Biberach, Germany

<sup>2</sup> Department of Pharmaceutical Technology, University of Bonn, Gerhard-Domagk-Straße 3, 53121 Bonn, Germany

<sup>3</sup> Device Development, Boehringer Ingelheim Pharma GmbH & Co. KG, Binger Straße 173, 55216 Ingelheim am Rhein

<sup>4</sup> Department Discovery Research, Boehringer Ingelheim RCV GmbH & Co KG, Dr.-Boehringer-Gasse 5-11, 1121 Vienna, Austria

\* Prof. Dr. Karl Gerhard Wagner, Department of Pharmaceutical Technology, University of Bonn, Ger-hard-Domagk-Straße 3, 53121 Bonn, Germany, Phone: +49 228 73 5271, E-mail address: karl.wagner@uni-bonn.de

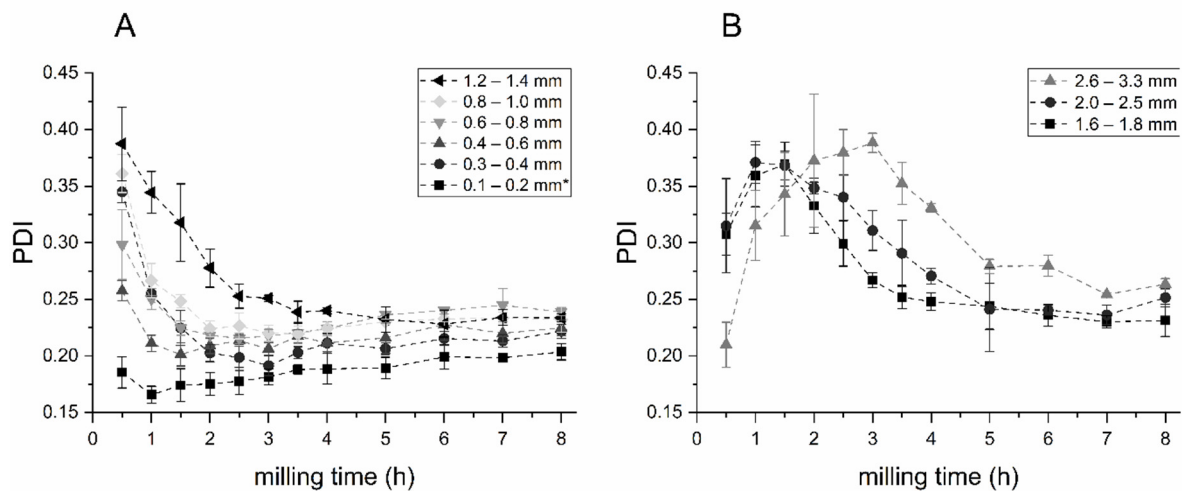

**Figure S1.** Effect of milling bead size on the polydispersity index (PDI) of ITZ particles (relating to F6). Values are expressed as mean  $\pm$  SD,  $n = 3$ . Milling was carried out at 4°C with 1500 rpm. \*Bead size 0.1 - 0.2 mm: stabilizer concentration had to be changed to 0.9% (w/w) HPC-SL, 0.28% (w/w) PS80 and 0.28% (w/w) SDS (see chapter 4). Data are shown in two figures (A & B) for better readability.

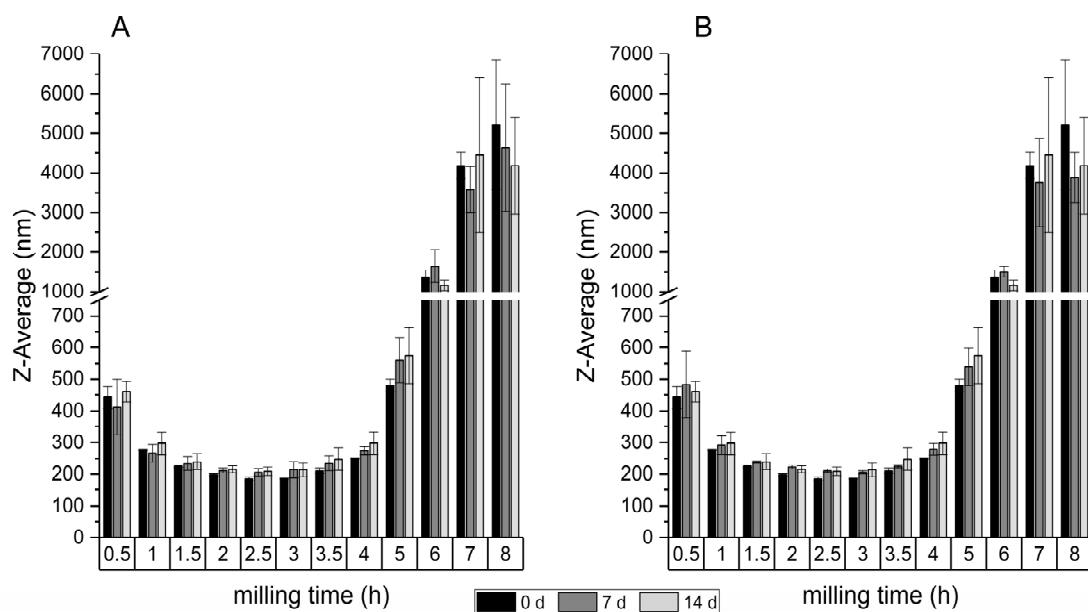

**Figure S2.** Particle sizes of formulation F2 stored at refrigerated conditions (A) and room temperature (B) for different storage periods. Values are expressed as mean  $\pm$  SD,  $n = 3$ . Milling was carried out at 4°C with 1500 rpm and milling beads sized 0.3 – 0.4 mm.

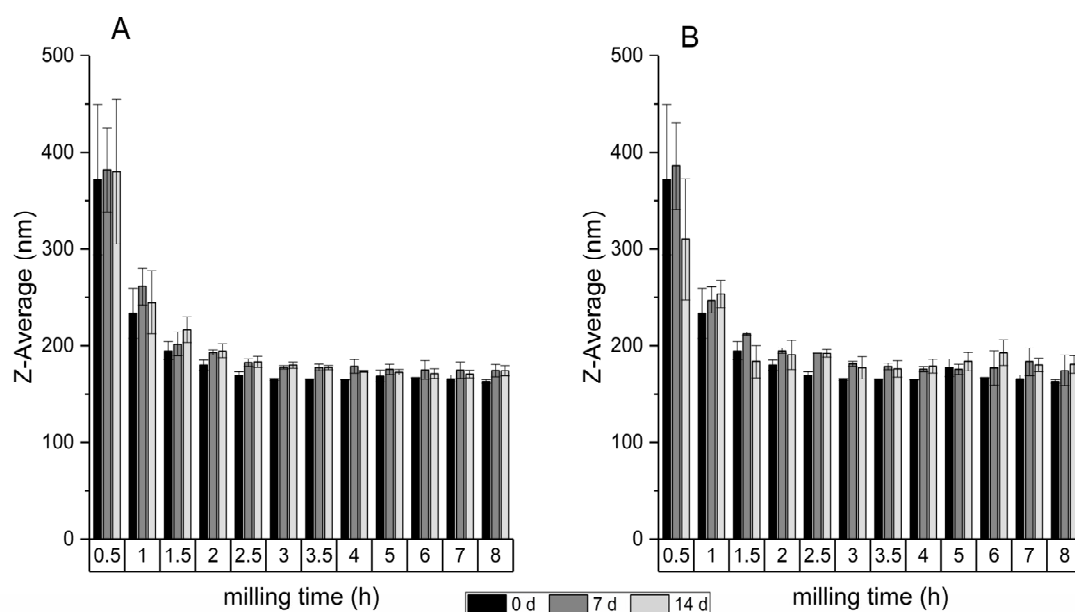

**Figure S3.** Particle sizes of formulation F6 stored at refrigerated conditions (A) and room temperature (B) after different storage periods. Values are expressed as mean  $\pm$  SD,  $n = 3$ . Milling was carried out at 4°C with 1500 rpm and milling beads sized 0.3 – 0.4 mm.

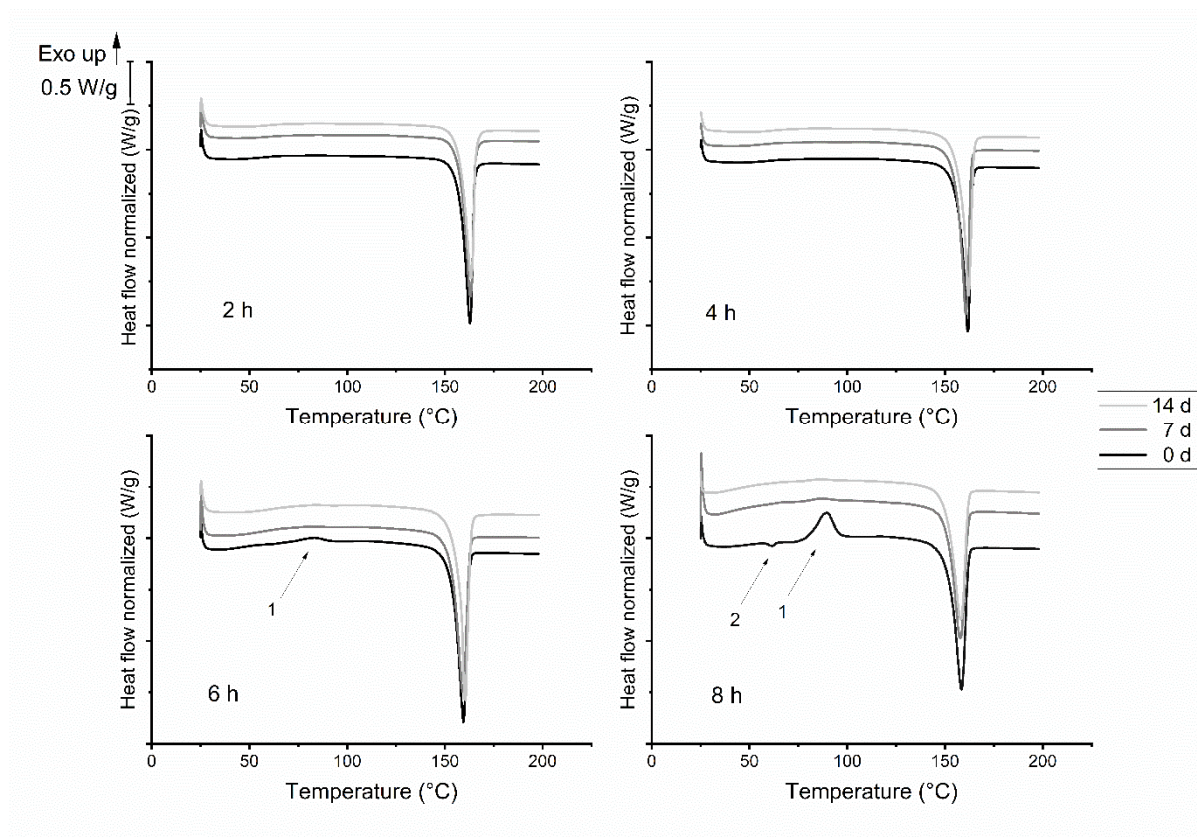

**Figure S4.** DSC thermograms of F2 ITZ nanosuspension after storage at refrigerated conditions for storage periods of 0, 7, and 14 days. Milling was carried out at 4°C with 1500 rpm and milling beads sized 0.3 – 0.4 mm. Milling time is indicated in the lower left corner of each figure. Plots are shifted for a better illustration. Arrow 1 marks an exothermic event, arrow 2 marks an endothermic event.

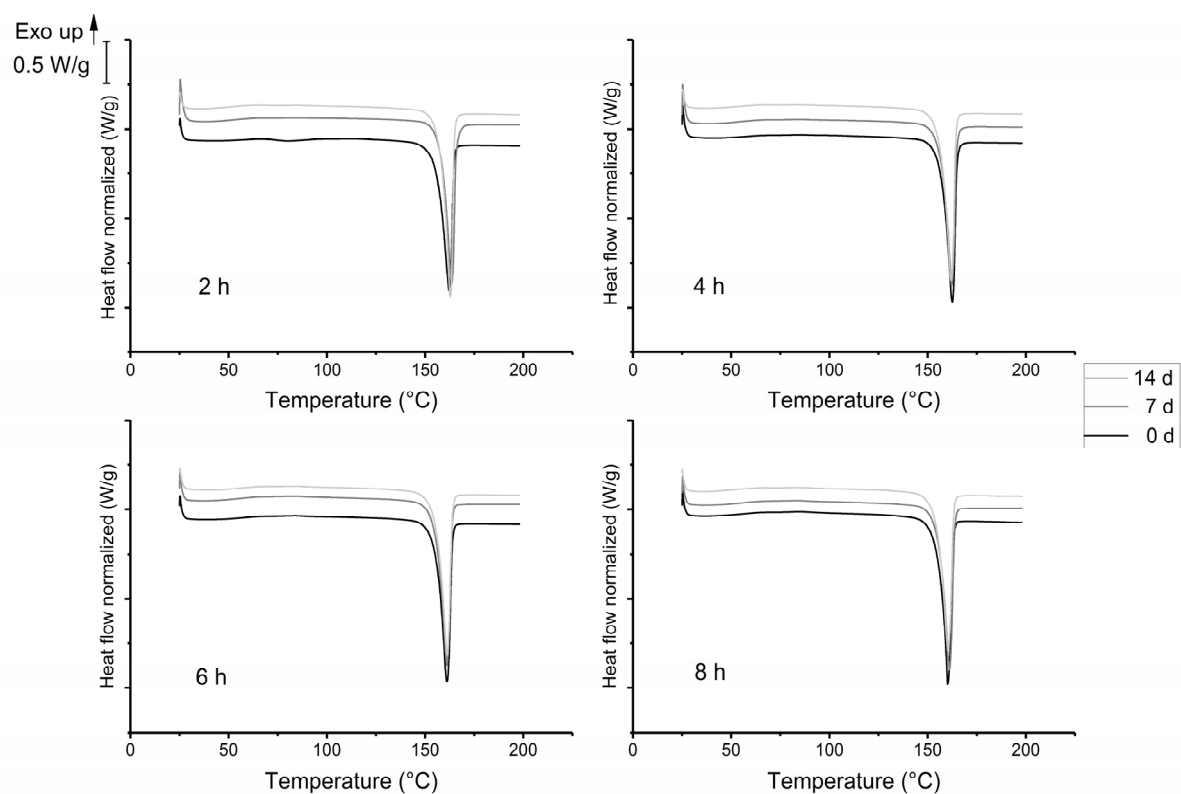

**Figure S5. DSC thermograms of F6 ITZ nanosuspension after storage at refrigerated conditions for different storage periods of 0, 7, and 14 days. Milling was carried out at 4°C with 1500 rpm and milling beads sized 0.3 – 0.4 mm. Milling time is indicated in the lower left corner of each figure. Plots are shifted for a better illustration.**

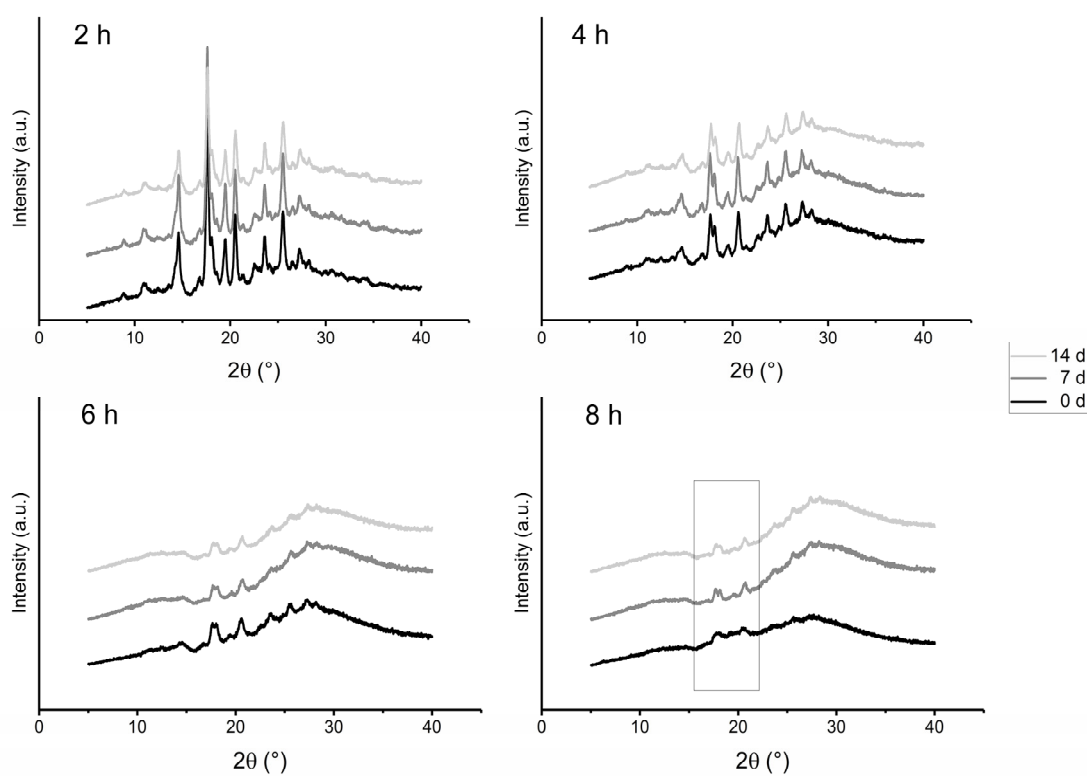

**Figure S6.** XRPD patterns of F2 ITZ nanosuspension after storage for different storage periods of 0, 7, and 14 days at refrigerated conditions. Milling was carried out at 4°C with 1500 rpm and milling beads sized 0.3 – 0.4 mm. Milling time is indicated in the upper left corner of each figure. Plots are shifted for better a illustration. Marked area: increase in peak intensity.

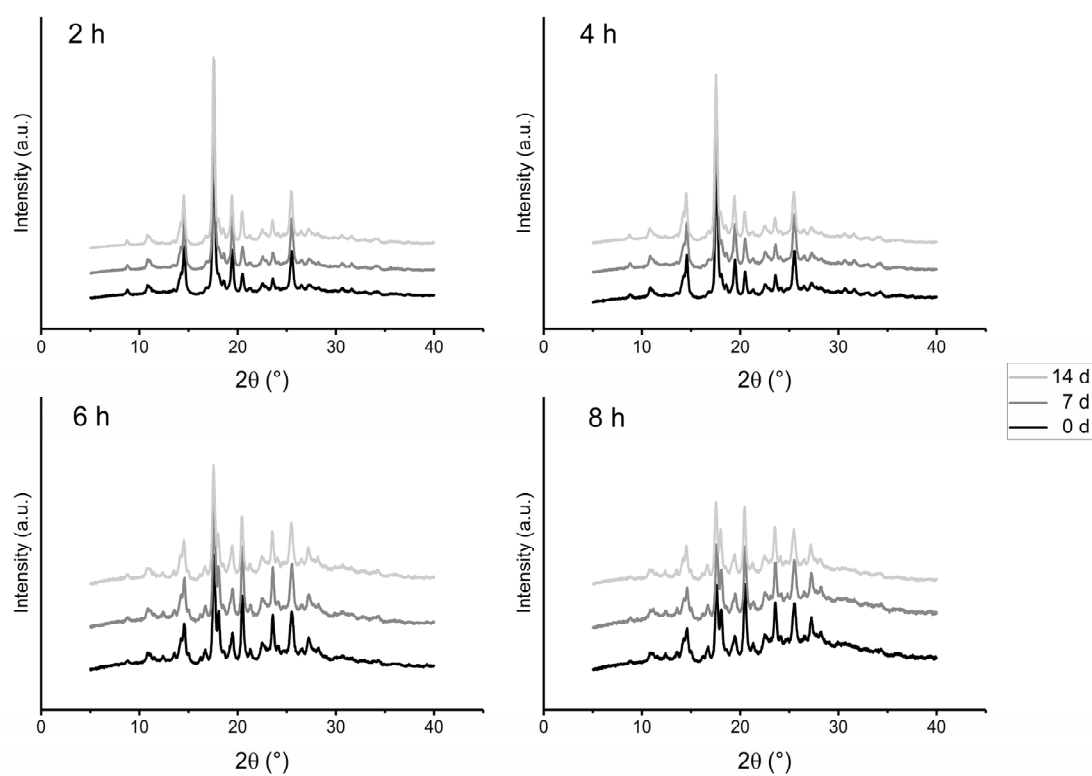

**Figure S7.** XRPD patterns of the F6 ITZ nanosuspension after storage for different storage periods of 0, 7, and 14 days at refrigerated conditions. Milling was carried out at 4°C with 1500 rpm and milling beads sized 0.3 – 0.4 mm. Milling time is indicated in the upper left corner of each figure. Plots are shifted for a better illustration.

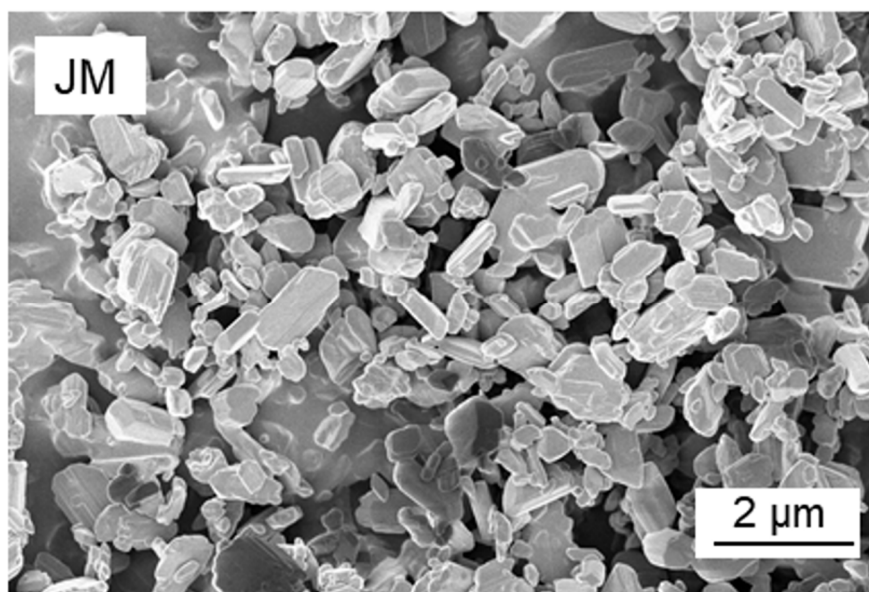

**Figure S8.** SEM image of jet-milled (JM) ITZ particles used as starting material for nanomilling.
